# Supplementary material
Source: Elsevier journal article supplement (https://www.sciencedirect.com/science/article/pii/S0211699520300345)
Supplement: mmc1 [file S0211699520300345:mmc1.docx]

Supplementary Table 1 The characteristics of included studies (Diabetic Nephropathy vs Type 2 Diabetes Mellitus) in this meta-analysis

| Study name | Year | Country | Ethnicity | Source of DNA | No of Cases | No of Controls | NOS Score | Genotyping method |
| --- | --- | --- | --- | --- | --- | --- | --- | --- |
| **[DN]** | **[T2DM]** |
| Bhaskar et al | 2013 | India | Asian | Blood | 54 | 67 | 07 | PCR-RFLP |
| Erdogan et al | 2007 | Turkey | Asian | Blood | 43 | 48 | 07 | PCR-RFLP |
| Maeda et al | 2004 | Japan | Asian | Blood | 79 | 61 | 08 | PCR-RFLP |
| This study et al | 2017 | India | Asian | Blood | 128 | 148 | 07 | ARMS-PCR |
| Wu et al | 2009 | China | Asian | Blood | 215 | 178 | 06 | Real time PCR |

*PCR- Polymerase Chain Reaction, RFLP-Restriction Fragment Length Polymorphism, ARMS-PCR Amplification-Refractory Mutation System

Supplementary Table 2 The characteristics of included studies (Type 2 Diabetes Mellitus vs Controls) in this meta-analysis

| Study name | Year | Country | Ethnicity | Source of DNA | No of Cases | No of Controls | NOS Score | Genotyping method |
| --- | --- | --- | --- | --- | --- | --- | --- | --- |
| **[T2DM]** |
| Deeb et al | 1998 | USA | Caucasian | N.A | 91 | 54 | 07 | SSCP |
| Hara et al | 2000 | Japan | Asian | Blood | 415 | 541 | 08 | PCR-RFLP |
| Lin et al | 2010 | China | Asian | Blood | 1529 | 1439 | 08 | PCR |
| Mori et al | 2001 | Japan | Asian | Blood | 2203 | 1212 | 08 | PCR-RFLP |
| Pattanayak et al | 2013 | India | Asian | Blood | 200 | 200 | 07 | DNA-Sequencing |
| Phani et al | 2015 | India | Asian | Blood | 589 | 518 | 07 | ARMS-PCR |
| Tripathi et al | 2013 | India | Asian | Blood | 190 | 210 | 08 | PCR-RFLP |
| This study et al | 2017 | India | Asian | Blood | 148 | 148 | 07 | ARMS-PCR |
| Vimaleswaran et al | 2009 | India | Asian | Blood | 1000 | 1000 | 07 | PCR-RFLP |

SSCP-Single-Strand Conformation Polymorphism, PCR-Polymerase Chain Reaction, RFLP-Restriction Fragment Length Polymorphism, ARMS-PCR Amplification-Refractory Mutation System
